# Supplementary material
Source: publisher figshare collection journal article supplement (https://tandf.figshare.com/articles/dataset/_/24756924)

## Supplemental Figure 1. Modified PRISMA flow chart for component principle one.

## Supplemental Figure 2. Modified PRISMA flow chart for component principle two.

## Supplemental Figure 3. Modified PRISMA flow chart for component principle three.

## Supplemental Figure 4. Modified PRISMA flow chart for component principle four.

## Supplemental Figure 5. Substantial growth in average publication rate per annum for component principles in five-year intervals from 1969-2021.

## *NB. The final interval is 2014-2021.


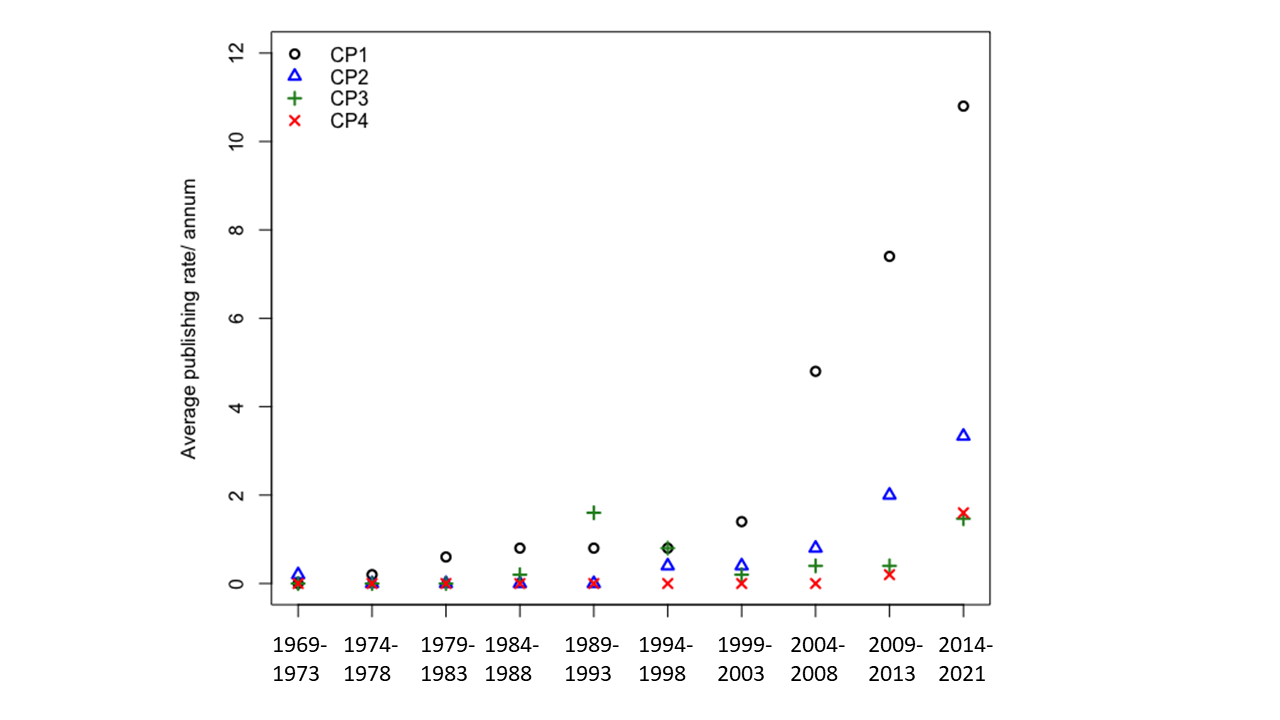


## Supplemental Figure 6. Expert rated scores for literature published in 1969-2018 and 2019-2021. Dotted line: 1969-2018; Solid line: 2019-2021. N = 10.


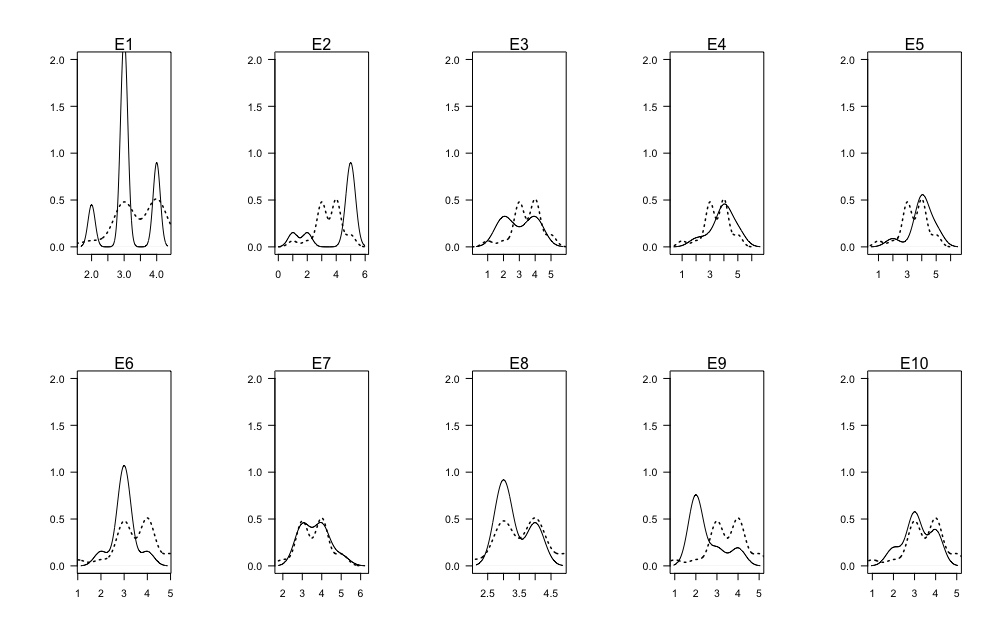

Supplement: Supplementary file 1 [file 1]
